# Supplementary material for: New ethionamide boosters and EthR2: structural and energetic analysis
Source: Royal Society of Chemistry journal article supplement (doi:10.1039/d1cp02853g), 2021-01-01
Supplement: d1cp02853g2.pdf [file d1cp02853g2.pdf]

## Electronic Supplementary Information

### **New Ethionamide boosters and EthR2: structural and energetic analysis**

J. F. Vianna <sup>a</sup>, K. S. Bezerra <sup>a</sup>, A. H. Lima Costa <sup>a</sup>, E. D. Barbosa <sup>a</sup>,

J. X. Lima Neto <sup>a</sup>, J. I. N. Oliveira <sup>a</sup>, V. N. Freire <sup>b</sup> and U. L. Fulco <sup>\*a</sup>

<sup>a</sup> *Departamento de Biofísica e Farmacologia, Universidade Federal do Rio Grande do Norte, 59072-970, Natal-RN, Brazil. Fax: +-55 (84) 3215-3791; Tel: +-55 (84) 3215-3419; E-mail: umbertofulco@gmail.com and*

<sup>b</sup> *Departamento de Física, Universidade Federal do Ceará, 60455-760, Fortaleza-CE, Brazil.*

TABLE S1. Selected second-order perturbation theory analysis of Fock matrix in NBO basis of BDM72719 - Trp100 complex. The red text depicts the LP!BD\* interaction.

| Donor<br>(i)                 | Acceptor<br>(j) | E <sup>(2)</sup><br>kcal/mol |
|------------------------------|-----------------|------------------------------|
| <b>from unit 1 to unit 2</b> |                 |                              |
| BD(2) C1-C2                  | BD*(2) C40-C48  | 0.07                         |
| BD(1) C3-H17                 | RY*(3) C38      | 0.07                         |
| BD(1) C4-O14                 | RY*(1) H49      | 0.06                         |
| BD(2) C10-C13                | BD*(2) C40-C48  | 0.06                         |
| LP*(1) C4                    | RY*(1) H51      | 0.05                         |
| LP*(1) C4                    | BD*(2) C46-C50  | 0.05                         |
| LP(1) O14BD*(1) C48-H49      |                 | 0.06                         |
| LP(3) O14                    | BD*(1) C40-C48  | 0.05                         |
| LP(3) O14                    | BD*(2) C40-C48  | 0.08                         |
| LP(3) O14                    | BD*(1) C46-C50  | 0.07                         |
| LP(3) O14                    | BD*(2) C46-C50  | 0.09                         |
| BD*(2) C1-C2                 | BD*(2) C40-C48  | 0.85                         |
| <b>from unit 2 to unit 1</b> |                 |                              |
| BD(2) C40-C48                | BD*(2) C1-C2    | 0.05                         |
| BD(2) C46-C50                | LP*(1) C4       | 0.06                         |

TABLE S2. Selected second-order perturbation theory analysis of Fock matrix in NBO basis of BDM72719 - Phe126. The red text depicts the LP→BD\* interaction.

| Donor<br>(i)                 | Acceptor<br>(j) | E <sup>(2)</sup><br>kcal/mol |
|------------------------------|-----------------|------------------------------|
| <b>from unit 1 to unit 2</b> |                 |                              |
| BD(1) C5-C6                  | RY*(3) C44      | 0.11                         |
| BD(1) C5-H20                 | RY*(1) H45      | 0.06                         |
| BD(1) C5-H20                 | RY*(1) H47      | 0.06                         |
| BD(1) C5-H20                 | BD*(1) C40-C44  | 0.06                         |
| BD(1) C5-H20                 | BD*(2) C40-C44  | 0.07                         |
| BD(1) C5-H20                 | BD*(2) C42-C46  | 0.09                         |
| BD(1) C6-C7                  | RY*(1) C44      | 0.06                         |
| BD(1) C6-C7                  | RY*(3) C44      | 0.25                         |
| BD(1) C6-H22                 | RY*(2) O49      | 0.07                         |
| BD(1) C6-H22                 | BD*(2) C40-C44  | 0.08                         |
| BD(1) C7-H23                 | RY*(1) H33      | 0.06                         |
| BD(1) C7-H25                 | BD*(1) C44-H45  | 0.17                         |
| BD(1) C7-H25                 | BD*(1) C44-C46  | 0.06                         |
| <b>from unit 2 to unit 1</b> |                 |                              |
| BD(1) C32-C48                | RY*(1) H22      | 0.06                         |
| BD(1) C40-C44                | RY*(2) C7       | 0.06                         |
| BD(2) C40-C44                | BD*(1) C6-H21   | 0.09                         |
| BD(2) C40-C44                | BD*(1) C6-H22   | 0.06                         |
| BD(2) C40-C44                | BD*(1) C7-H24   | 0.19                         |
| BD(2) C42-C46                | BD*(1) C6-H22   | 0.05                         |
| BD(1) C44-H45                | BD*(1) C7-H25   | 0.18                         |
| BD(1) C44-C46                | RY*(1) H20      | 0.07                         |
| BD(1) C46-H47                | BD*(1) C5-H20   | 0.12                         |
| LP(1) O49BD*(1) C6-H22       |                 | 0.08                         |
| BD*(2) C40-C44               | BD*(1) C6-H21   | 0.05                         |

TABLE S3. Selected second-order perturbation theory analysis of Fock matrix in NBO basis of BDM72719 - Ile164. The red text depicts the LP→BD\* interaction.

| Donor<br>(i)                 | Acceptor<br>(j) | E <sup>(2)</sup><br>kcal/mol |
|------------------------------|-----------------|------------------------------|
| <b>from unit 1 to unit 2</b> |                 |                              |
| BD(1) C3-H16                 | RY*(1) H33      | 0.08                         |
| BD(1) C3-H16                 | BD*(1) C32-H33  | 0.14                         |
| BD(1) C3-H16                 | BD*(1) C36-H38  | 0.09                         |
| BD(1) C3-H16                 | BD*(1) C40-H41  | 0.14                         |
| BD(1) C3-H8                  | BD*(1) C40-H41  | 0.12                         |
| LP(1) N9BD*(1) C36-H38       |                 | 0.73                         |
| <b>from unit 2 to unit 1</b> |                 |                              |
| BD(1) C32-H33                | RY*(1) H16      | 0.07                         |
| BD(1) C32-H33                | BD*(1) C3-H16   | 0.14                         |
| BD(1) C36-H38                | RY*(3) N9       | 0.07                         |
| BD(1) C36-H38                | BD*(1) C3-H16   | 0.11                         |
| BD(1) C40-H41                | BD*(1) C3-H17   | 0.05                         |

TABLE S4. Selected second-order perturbation theory analysis of Fock matrix in NBO basis of BDM72719 - Ile113. The red text depicts the LP→BD\* interaction.

| Donor<br>(i)                 | Acceptor<br>(j) | E <sup>(2)</sup><br>kcal/mol |
|------------------------------|-----------------|------------------------------|
| <b>from unit 1 to unit 2</b> |                 |                              |
| BD(1) C5-H19                 | BD*(1) C34-C36  | 0.22                         |
| BD(1) C5-H19                 | BD*(1) C36-H38  | 0.07                         |
| BD(1) C6-C7                  | RY*(1) H38      | 0.06                         |
| BD(1) C7-H23                 | BD*(1) C36-H38  | 0.10                         |
| BD(1) C7-H24                 | RY*(1) H38      | 0.19                         |
| BD(1) C7-H24                 | RY*(4) H38      | 0.06                         |
| BD(1) C7-H24                 | BD*(1) C36-H38  | 0.68                         |
| BD(1) C7-H24                 | BD*(1) C43-H46  | 0.41                         |
| BD(1) C7-H25                 | RY*(1) H38      | 0.22                         |
| BD(1) C7-H25                 | RY*(4) H38      | 0.06                         |
| BD(1) C7-H25                 | RY*(2) O48      | 0.06                         |
| BD(1) C7-H25                 | BD*(1) C36-H38  | 0.37                         |
| <b>from unit 2 to unit 1</b> |                 |                              |
| BD(1) C34-C36                | RY*(1) H19      | 0.08                         |
| BD(1) C36-H37                | RY*(2) H19      | 0.11                         |
| BD(1) C36-H37                | BD*(1) C5-H19   | 0.24                         |
| BD(1) C36-H38                | RY*(1) H19      | 0.07                         |
| BD(1) C36-H38                | RY*(2) H19      | 0.18                         |
| BD(1) C36-H38                | BD*(1) C5-N11   | 0.07                         |
| BD(1) C36-H38                | BD*(1) C5-H19   | 0.21                         |
| BD(1) C36-H38                | BD*(1) C7-H23   | 0.27                         |
| BD(1) C43-H46                | BD*(1) C7-H24   | 0.36                         |
| BD(2) C47-O48                | BD*(1) C7-H25   | 0.05                         |
| LP(1) O48BD*(1) C7-H25       |                 | 0.15                         |
| LP(2) O48BD*(1) C7-H25       |                 | 0.24                         |

TABLE S5. Selected second-order perturbation theory analysis of Fock matrix in NBO basis of BDM72719 - Ala130. The red text depicts the LP→BD\* interaction.

| Donor<br>(i)                 | Acceptor<br>(j) | E <sup>(2)</sup><br>kcal/mol |
|------------------------------|-----------------|------------------------------|
| <b>from unit 1 to unit 2</b> |                 |                              |
| BD(1) C6-H21                 | RY*(1) H33      | 0.06                         |
| BD(1) C6-H21                 | BD*(1) C32 -H33 | 0.09                         |
| BD(1) C6-H22                 | BD*(1) C34 -H37 | 0.29                         |
| BD(1) N8-H26                 | BD*(1) C34 -H35 | 0.16                         |
| BD(1) N11-H28                | RY*(3) C34      | 0.07                         |
| BD(1) N11-H28                | BD*(1) C34-H36  | 0.31                         |
| LP(1) N8                     | RY*(1) O39      | 0.06                         |
| LP(1) N11                    | BD*(1) C32-H33  | 0.13                         |
| LP(1) N11                    | BD*(1) C34-H36  | 0.14                         |
| BD*(1) C4-O14                | BD*(1) C32-H33  | 0.14                         |
| <b>from unit 2 to unit 1</b> |                 |                              |
| BD(1) C32-H33                | BD*(1) C6-H21   | 0.06                         |
| BD(1) C34-H35                | RY*(3) H28      | 0.10                         |
| BD(1) C34-H35                | BD*(1) N8-H26   | 0.37                         |
| BD(1) C34-H35                | BD*(1) N11-H28  | 0.88                         |
| BD(1) C34-H36                | BD*(1) N11-H28  | 0.17                         |
| BD(1) C34-H37                | RY*(3) N11      | 0.06                         |
| BD(1) C34-H37                | RY*(3) H28      | 0.10                         |
| BD(1) C34-H37                | BD*(1) C6-H22   | 0.18                         |
| BD(1) C34-H37                | BD*(1) N11-H28  | 0.52                         |
| LP(1) N30                    | BD*(1) C6-H21   | 0.06                         |

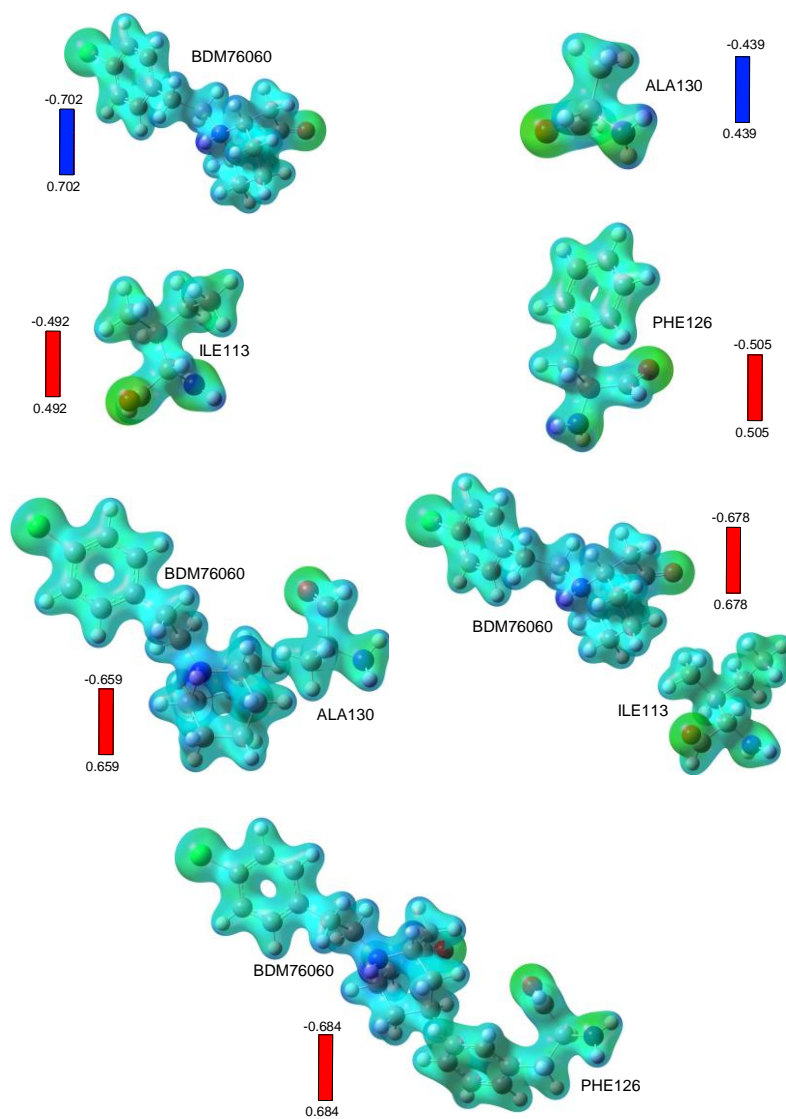

FIG. S1. The electrostatic potential maps show the ligand BDM76060 and the most relevant amino acids, as well as the protein-bound ligands.
