# Supplementary figures and images for: New ethionamide boosters and EthR2: structural and energetic analysis
Source: Royal Society of Chemistry journal article supplement (doi:10.1039/d1cp02853g), 2021-01-01

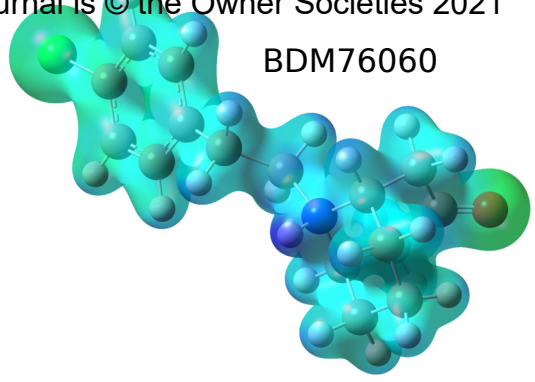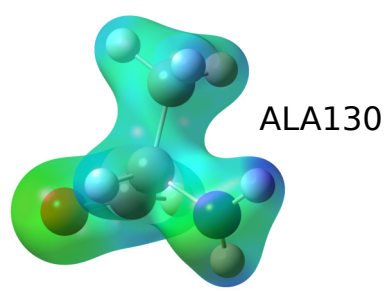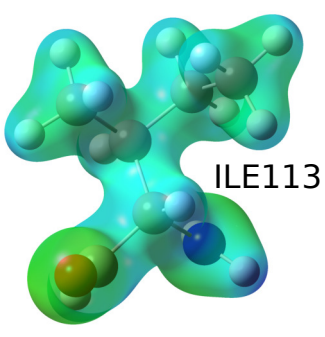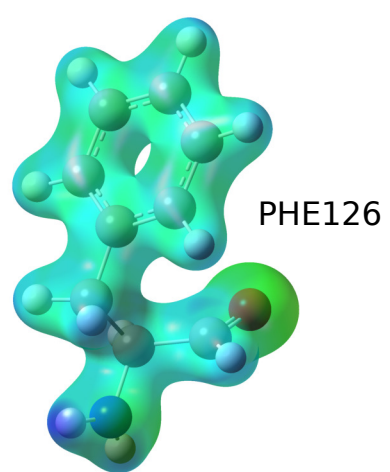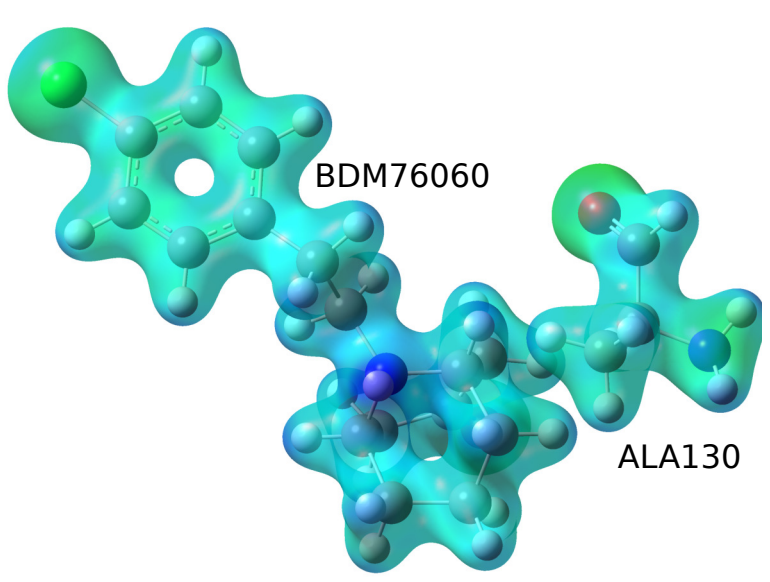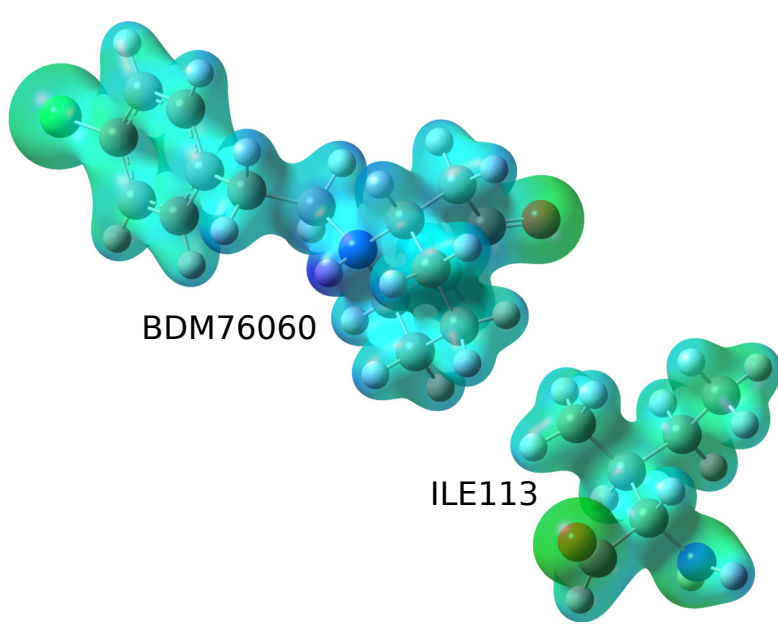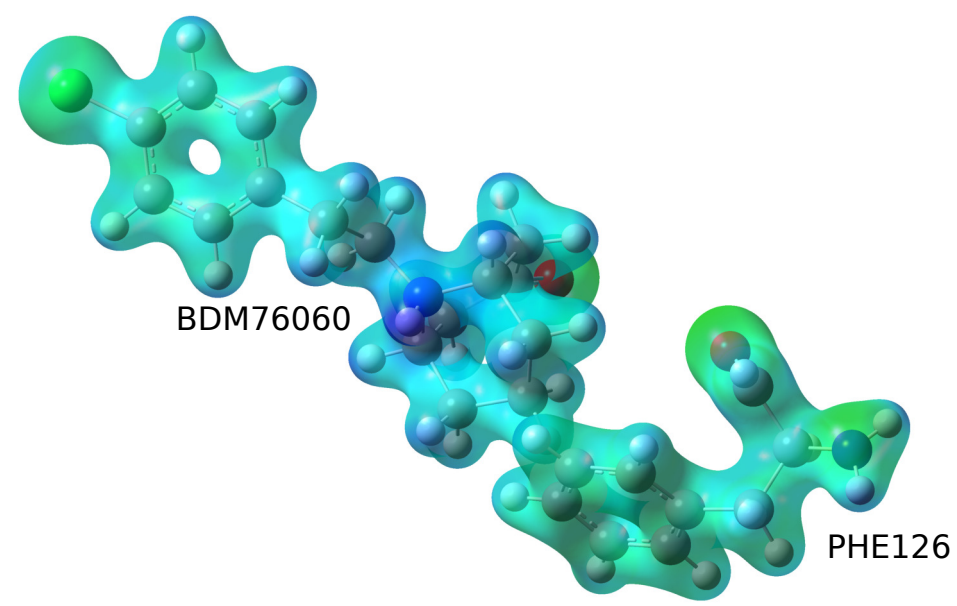

Supplement: d1cp02853g3.pdf [file d1cp02853g3.pdf]
